# Supplementary material for: Molten salt synthesis of nitrogen doped porous carbon: a new preparation methodology for high-volumetric capacitance electrode materials
Source: Royal Society of Chemistry journal article supplement (doi:10.1039/c6ta02673g), 2016-01-01
Supplement: c6ta02673g1.pdf [file c6ta02673g1.pdf]

## Electronic Supporting Information

### Molten salt synthesis of nitrogen doped porous carbon: A new preparation methodology for high-volumetric capacitance electrodes materials

Tian Ouyang, Kui Cheng\*, Yinyi Gao, Shuying Kong, Ke Ye, Guiling Wang,

Dianxue Cao\*

*Key Laboratory of Superlight Material and Surface Technology of Ministry of*

*Education, College of Material Science and Chemical Engineering, Harbin*

*Engineering University, Harbin 150001, China*

Table S1: Chemical composition of Fresh tofu

| <b>Composition</b> | <b>Contents (in every 100g)</b> |
|--------------------|---------------------------------|
| Moisture           | 80 g                            |
| Protein            | 12.2 g                          |
| Fat                | 4.8 g                           |
| Carbohydrate       | 2 g                             |
| Dietary fiber      | 0.5 g                           |
| Ca                 | 138 mg                          |
| Mg                 | 63 mg                           |

Table S2: The carbon yield of different samples

| <b>Sample</b> | <b>Yield</b> |
|---------------|--------------|
| PC            | 12.0%        |
| APC           | 4.8%         |
| NPC-750-0     | 11.8%        |
| NPC-750-0.15  | 8.0%         |
| NPC-750-0.25  | 5.2%         |
| NPC-750-0.35  | 3.4%         |
| NPC-650-0.25  | 12.0%        |
| NPC-850-0.25  | 4.6%         |

\* Corresponding author. Tel: 010-86-451-82589036, Fax: 010-86-451-82589036, E-mail address: [chengkui@hrbeu.edu.cn](mailto:chengkui@hrbeu.edu.cn) (Kui Cheng) [caodianxue@hrbeu.edu.cn](mailto:caodianxue@hrbeu.edu.cn) (Dianxue Cao).

Table S3: Physical and electrochemical properties of the as-prepared carbon materials

|                     | SSA<br>[m <sup>2</sup> g <sup>-1</sup> ] | $V_{\text{total}}^{\text{a}}$<br>[cm <sup>3</sup> g <sup>-1</sup> ] | $I_{\text{D}}/I_{\text{G}}$ | Elemental analysis |      |       |      | XPS <sup>b</sup> |      |       | % of total N1s |     |     | $C_{\text{m}}^{\text{c}}$<br>[F g <sup>-1</sup> ] | $C_{\text{V}}^{\text{d}}$<br>[F cm <sup>-3</sup> ] |
|---------------------|------------------------------------------|---------------------------------------------------------------------|-----------------------------|--------------------|------|-------|------|------------------|------|-------|----------------|-----|-----|---------------------------------------------------|----------------------------------------------------|
|                     |                                          |                                                                     |                             | C%                 | N%   | O%    | H%   | C%               | N%   | O%    | N-5            | N-6 | N-Q |                                                   |                                                    |
| <b>NPC-650-0.25</b> | 794                                      | 0.48                                                                | 0.910                       | 74.21              | 5.79 | 18.21 | 1.79 | 83.63            | 5.24 | 10.63 | 43             | 21  | 36  | 245                                               | 250                                                |
| <b>NPC-850-0.25</b> | 1193                                     | 0.69                                                                | 0.944                       | 83.02              | 3.68 | 12.14 | 1.16 | 89.70            | 3.52 | 6.78  | 44             | 22  | 34  | 323                                               | 223                                                |
| <b>NPC-750-0.15</b> | 1143                                     | 0.67                                                                | 0.936                       | 78.55              | 5.93 | 14.41 | 1.11 | 87.33            | 5.36 | 7.31  | 55             | 18  | 27  | 244                                               | 209                                                |
| <b>NPC-750-0.35</b> | 1097                                     | 0.70                                                                | 0.941                       | 80.81              | 4.39 | 13.35 | 1.45 | 87.96            | 3.91 | 8.13  | 47             | 20  | 33  | 207                                               | 173                                                |

<sup>a</sup> Total pore volume. <sup>b</sup> Weight percent of elements obtained from XPS analysis. <sup>c</sup> Gravimetric capacitance obtained at a current density of 1 A g<sup>-1</sup> in 6 mol L<sup>-1</sup> KOH based on three-electrode system. <sup>d</sup> Volumetric capacitance obtained at a current density of 1 A g<sup>-1</sup> in 6 mol L<sup>-1</sup> KOH based on three-electrode system.

Table S4: Comparison of the properties of carbon materials synthesized from other biomass and their application in supercapacitors

| Materials          | Activating agent               | SSA (m <sup>2</sup> g <sup>-1</sup> ) | Maximum Capacitance (F g <sup>-1</sup> ) | Measurements done at      | Electrolyte                         | Ref.             |
|--------------------|--------------------------------|---------------------------------------|------------------------------------------|---------------------------|-------------------------------------|------------------|
| Corncob residue    | oxidizing gas                  | 1210                                  | 314                                      | 5 mV s <sup>-1</sup>      | 6 M KOH                             | 1                |
| egg yolk           | KOH                            | 2277                                  | 287                                      | 0.5 A g <sup>-1</sup>     | 6 M KOH                             | 2                |
| bagasse waste      | KOH                            | 2296                                  | 320                                      | 0.5 A g <sup>-1</sup>     | 6 M KOH                             | 3                |
| Lignin             | KOH/NaOH                       | 1400                                  | 344                                      | 10 mV s <sup>-1</sup>     | 6 M KOH                             | 4                |
| Seaweed biopolymer | No activation                  | 270                                   | 198                                      | 2 mV s <sup>-1</sup>      | 1 M H <sub>2</sub> SO <sub>4</sub>  | 5                |
| microalgae         | KOH                            | 2130                                  | 200                                      | 0.1 A g <sup>-1</sup>     | 6 M LiCl                            | 6                |
| acacia gum         | KOH                            | 1832                                  | 272                                      | 1 A g <sup>-1</sup>       | 6 M KOH                             | 7                |
| Paulownia Sawdust  | NaOH                           | 1900                                  | 227                                      | 2 mV s <sup>-1</sup>      | 6 M KOH                             | 8                |
| rice husk          | H <sub>3</sub> PO <sub>4</sub> | 1493                                  | 112                                      | 1 A g <sup>-1</sup>       | 1 M Na <sub>2</sub> SO <sub>4</sub> | 9                |
| Pulp sludge        | KOH                            | 2980                                  | 190                                      | 2 mV s <sup>-1</sup>      | EMIM TFSI                           | 10               |
| Banana bers        | ZnCl <sub>2</sub>              | 1097                                  | 74                                       | 0.5 A g <sup>-1</sup>     | 1 M Na <sub>2</sub> SO <sub>4</sub> | 11               |
| <b>Tofu</b>        | <b>LiNO<sub>3</sub></b>        | <b>1202</b>                           | <b>429</b>                               | <b>1 A g<sup>-1</sup></b> | <b>6 M KOH</b>                      | <b>This work</b> |

Table S5: Comparison of energy density and power density of various carbon materials

| Materials                  | Medium                                  | Max energy density              | Max power density              | Ref.             |
|----------------------------|-----------------------------------------|---------------------------------|--------------------------------|------------------|
| Nanoporous carbon          | 1 M H <sub>2</sub> SO <sub>4</sub>      | 20 Wh kg <sup>-1</sup>          | —                              | 12               |
| Seaweeds-derived carbon    | 1 M H <sub>2</sub> SO <sub>4</sub>      | 19.5 Wh kg <sup>-1</sup>        | —                              | 13               |
| sugarcane bagasse          | 1 M H <sub>2</sub> SO <sub>4</sub>      | 10 Wh kg <sup>-1</sup>          | —                              | 14               |
| ALG-C                      | 1 M H <sub>2</sub> SO <sub>4</sub>      | 10 Wh kg <sup>-1</sup>          | 10 kW kg <sup>-1</sup>         | 5                |
| rice husk                  | 1 M Na <sub>2</sub> SO <sub>4</sub>     | 10 Wh kg <sup>-1</sup>          | 1421 W kg <sup>-1</sup>        | 9                |
| Hierarchical porous carbon | 1 M Na <sub>2</sub> SO <sub>4</sub>     | 15.9 Wh kg <sup>-1</sup>        | 18.8 kW kg <sup>-1</sup>       | 15               |
| Graphene/carbon black      | 6 M KOH                                 | —                               | 5.1 kW kg <sup>-1</sup>        | 16               |
| <b>tofu</b>                | <b>1 M Na<sub>2</sub>SO<sub>4</sub></b> | <b>32.95 Wh kg<sup>-1</sup></b> | <b>12.5 kW kg<sup>-1</sup></b> | <b>This work</b> |

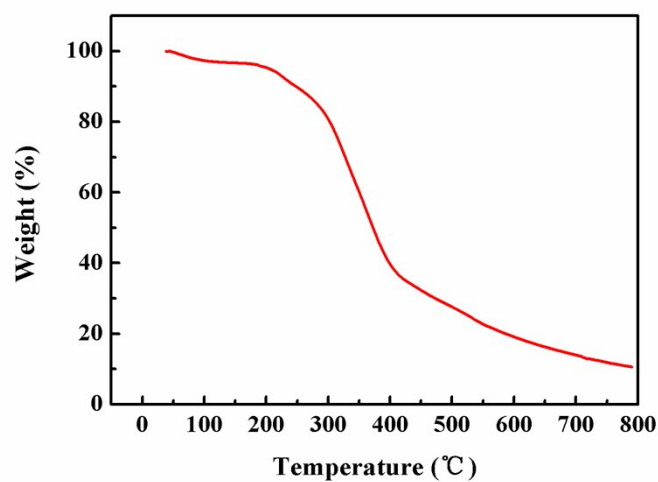

Figure S1 TG curves of Tofu powder

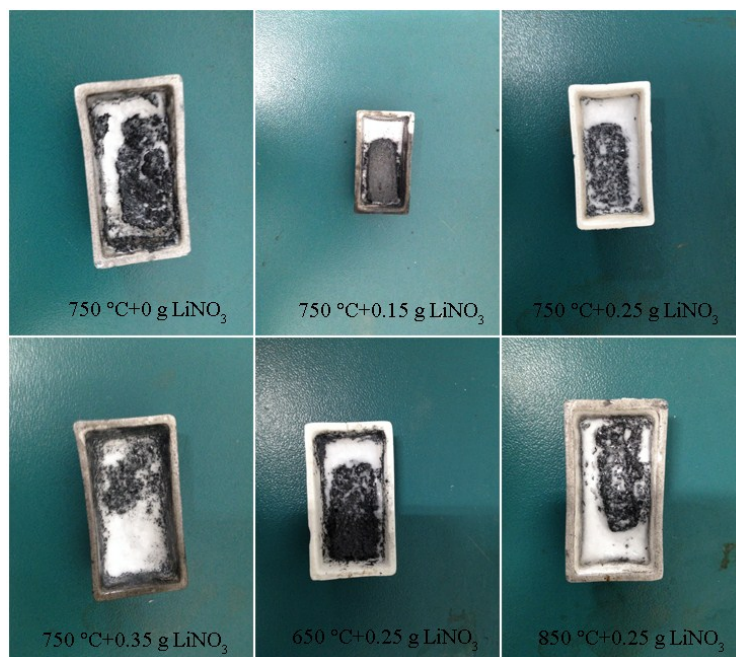

Figure S2 Comparison of the photograph of boat after carbonization

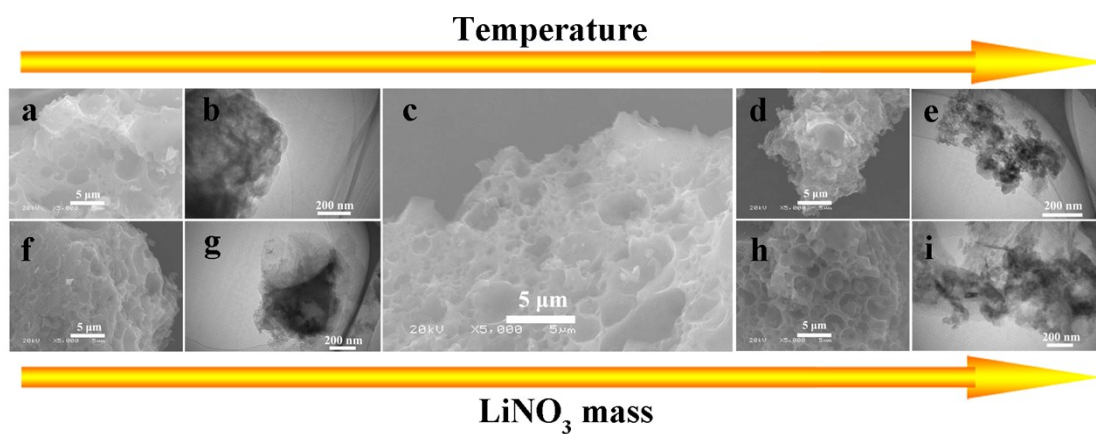

Figure S3 The SEM and TEM images of NPC-650-0.25 (a and b), NPC-750-0.25 (c), NPC-850-0.25 (d and e), NPC-750-0.15 (f and g) and NPC-750-0.35 (h and i), respectively.

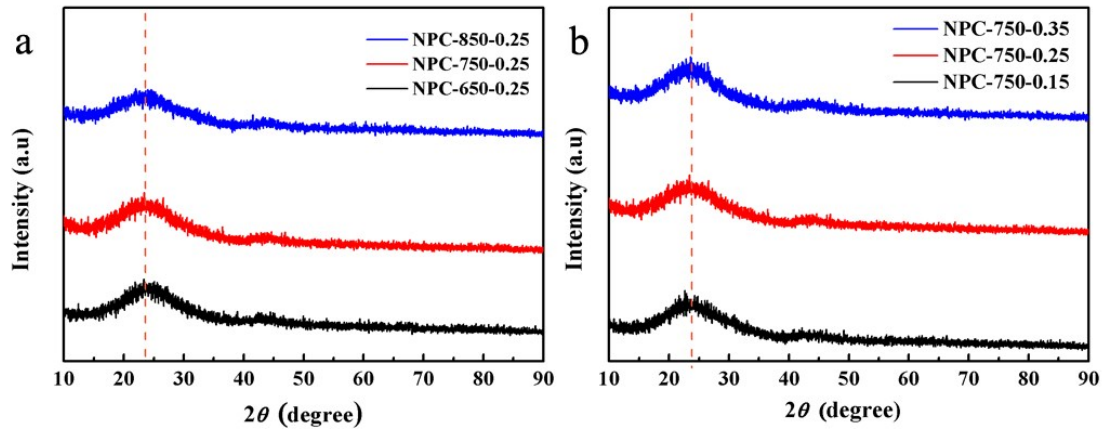

Figure S4 The XRD of carbon prepared at different temperature (a) and  $\text{LiNO}_3$  mass loading (b).

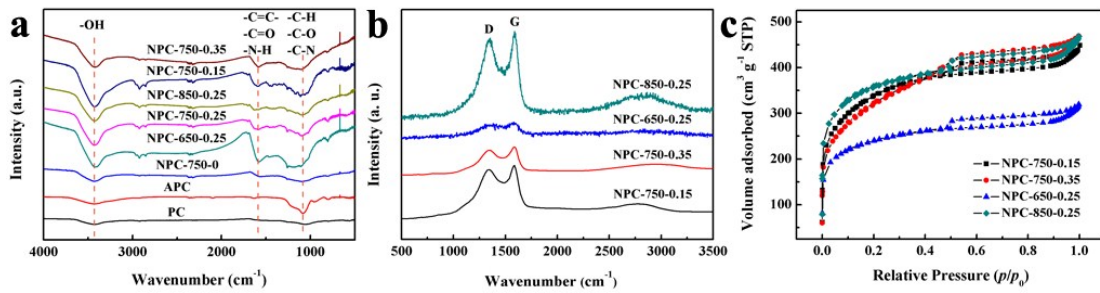

Figure S5 (a) FT-IR, (b) Raman and (c) BET of as-prepared samples, respectively.

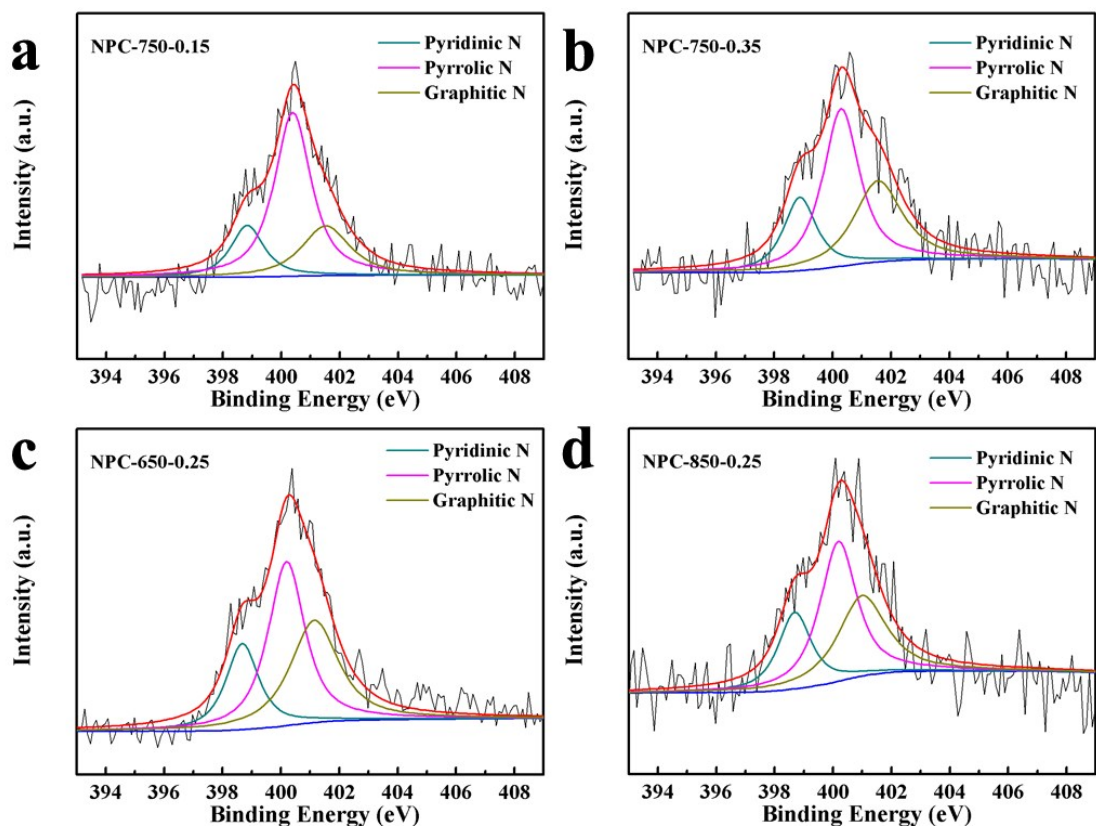

Figure S6 High-resolution XPS spectra of N 1s of NPC-750-0.15 (a), NPC-750-0.35 (b), NPC-650-0.25 (c) and NPC-850-0.25 (d), respectively.

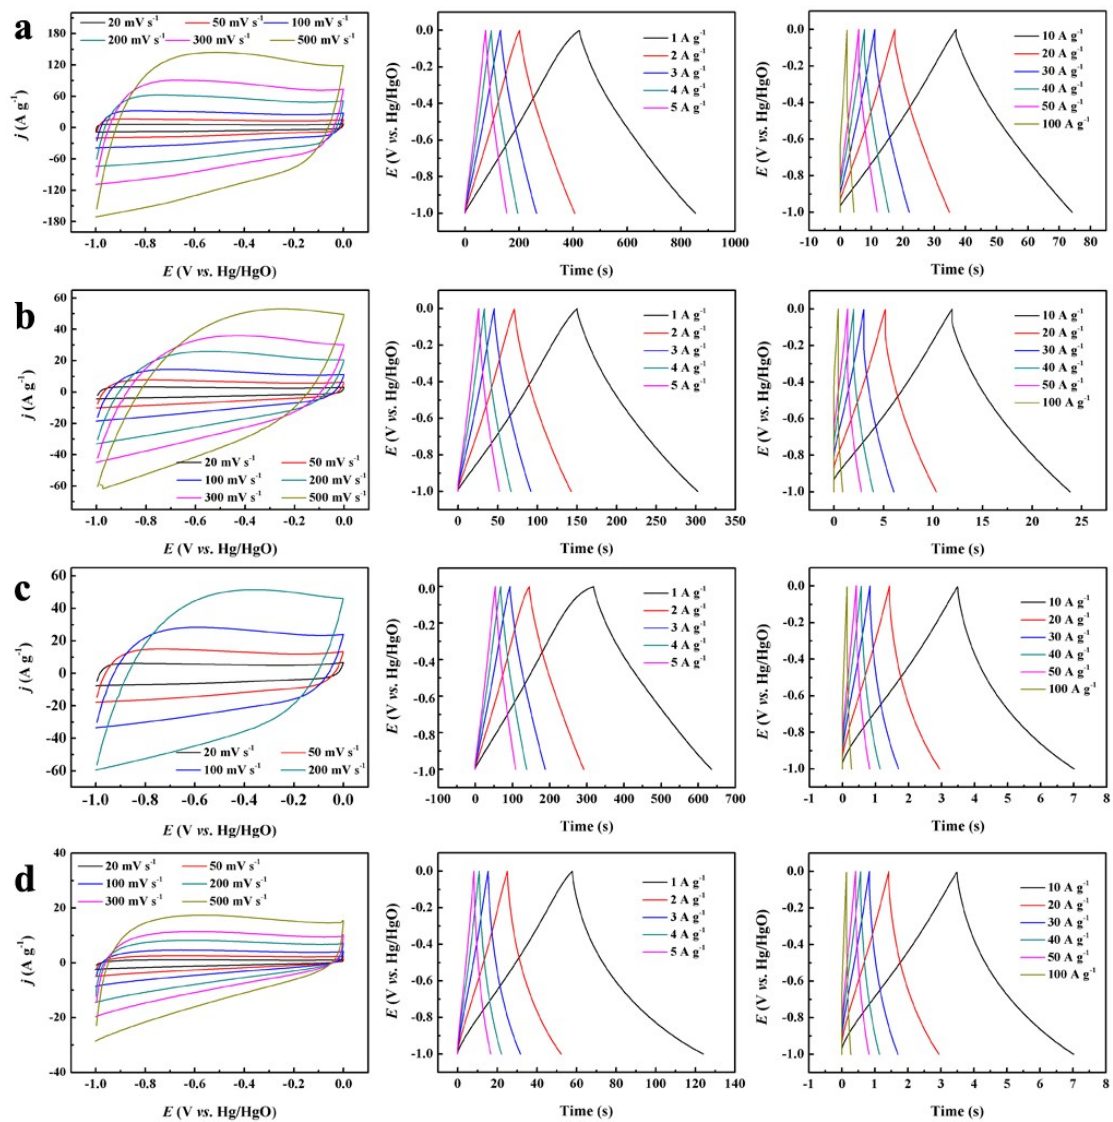

Figure S7 CV and GCD curves of NPC-750-0.25 (a), NPC-750-0 (b), APC(c), and PC (d), respectively.



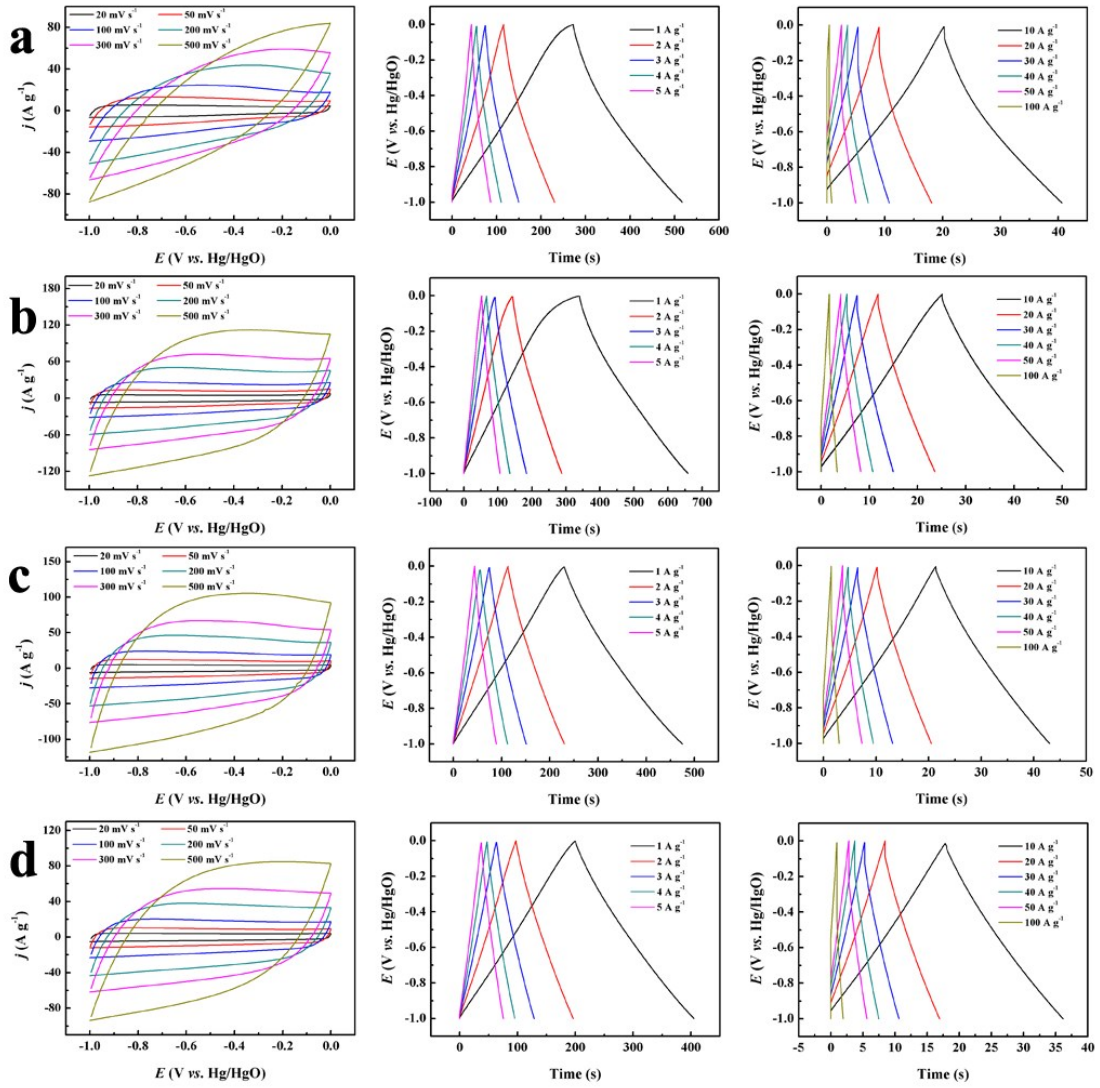

Figure S8 CV and GCD curves of NPC-60-0.25(a), NPC-80-0.2 (b), NPC-750-0.15 (c) and NPC-750-0.35 (d), respectively.

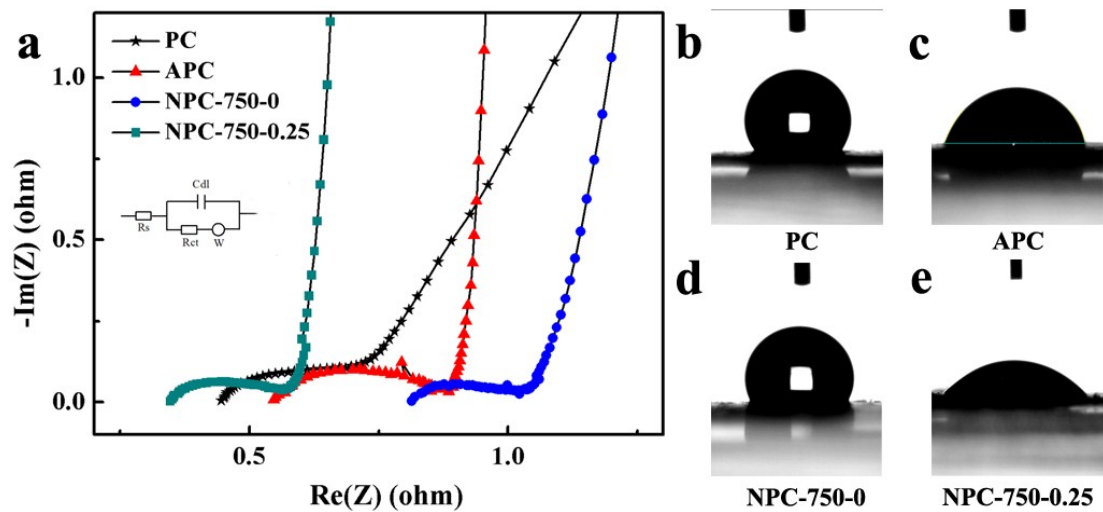



Figure S9 (a) The enlarged EIS of PC, APC, NPC-750-0 and NPC-750-0.25, the insert is the equivalent circuit diagram; Wetting angles of water droplet on PC (b) APC (c), NPC-750-0 (d) and NPC-750-0.25 (e) substrates.

#### REFERENCES:

1. W.-H. Qu, Y.-Y. Xu, A.-H. Lu, X.-Q. Zhang, W.-C. Li, Converting biowaste corncob residue into high value added porous carbon for supercapacitor electrodes, *Bioresource Technology*, 2015, **189**, 285-291.
2. Z. Guo, Z.-y. Wang, H.-h. Wang, G.-q. Huang, M.-m. Li, Electrochemical sensor for Isoniazid based on the glassy carbon electrode modified with reduced graphene oxide–Au nanomaterials, *Materials Science and Engineering: C*, 2015, **57**, 197-204.
3. H. Feng, H. Hu, H. Dong, Y. Xiao, Y. Cai, B. Lei, Y. Liu, M. Zheng, Hierarchical structured carbon derived from bagasse wastes: A simple and efficient synthesis route and its improved electrochemical properties for high-performance supercapacitors, *Journal of Power Sources*, 2016, **302**, 164-173.
4. S. Hu, S. Zhang, N. Pan, Y.-L. Hsieh, High energy density supercapacitors from lignin derived submicron activated carbon fibers in aqueous electrolytes, *Journal of Power Sources*, 2014, **270**, 106-112.
5. E. Raymundo-Piñero, F. Leroux, F. Béguin, A High-Performance Carbon for Supercapacitors Obtained by Carbonization of a Seaweed Biopolymer, *Advanced Materials*, 2006, **18**, 1877-1882.
6. M. Sevilla, W. Gu, C. Falco, M. M. Titirici, A. B. Fuertes, G. Yushin,

- Hydrothermal synthesis of microalgae-derived microporous carbons for electrochemical capacitors, *Journal of Power Sources*, 2014, **267**, 26-32.
7. Y. Fan, P. Liu, B. Zhu, S. Chen, K. Yao, R. Han, Microporous carbon derived from acacia gum with tuned porosity for high-performance electrochemical capacitors, *International Journal of Hydrogen Energy*, 2015, **40**, 6188-6196.
  8. X. Liu, M. Zheng, Y. Xiao, Y. Yang, L. Yang, Y. Liu, B. Lei, H. Dong, H. Zhang, H. Fu, Microtube Bundle Carbon Derived from Paulownia Sawdust for Hybrid Supercapacitor Electrodes, *ACS Applied Materials & Interfaces*, 2013, **5**, 4667-4677.
  9. A. Ganesan, R. Mukherjee, J. Raj, M. M. Shaijumon, Nanoporous rice husk derived carbon for gas storage and high performance electrochemical energy storage, *Journal of Porous Materials*, 2014, **21**, 839-847.
  10. H. Wang, Z. Li, J. K. Tak, C. M. B. Holt, X. Tan, Z. Xu, B. S. Amirkhiz, D. Harfield, A. Anyia, T. Stephenson, D. Mitlin, Supercapacitors based on carbons with tuned porosity derived from paper pulp mill sludge biowaste, *Carbon*, 2013, **57**, 317-328.
  11. V. Subramanian, C. Luo, A. M. Stephan, K. S. Nahm, S. Thomas, B. Wei, Supercapacitors from Activated Carbon Derived from Banana Fibers, *Journal of Physical Chemistry C*, 2007, **111**, 7527-7531.
  12. T. E. Rufford, D. Hulicova-Jurcakova, Z. Zhu, G. Q. Lu, Nanoporous carbon electrode from waste coffee beans for high performance supercapacitors, *Electrochemistry Communications*, 2008, **10**, 1594-1597.

13. E. Raymundo-Piñero, M. Cadek, F. Béguin, Tuning Carbon Materials for Supercapacitors by Direct Pyrolysis of Seaweeds, *Advanced Functional Materials*, 2009, **19**, 1032-1039.
14. T. E. Rufford, D. Hulicova-Jurcakova, K. Khosla, Z. Zhu, G. Q. Lu, Microstructure and electrochemical double-layer capacitance of carbon electrodes prepared by zinc chloride activation of sugar cane bagasse, *Journal of Power Sources*, 2010, **195**, 912-918.
15. Q. Wang, J. Yan, Y. Wang, T. Wei, M. Zhang, X. Jing, Z. Fan, Three-dimensional flower-like and hierarchical porous carbon materials as high-rate performance electrodes for supercapacitors, *Carbon*, 2014, **67**, 119-127.
16. G. Wang, X. Sun, F. Lu, H. Sun, M. Yu, W. Jiang, C. Liu, J. Lian, Flexible Pillared Graphene-Paper Electrodes for High-Performance Electrochemical Supercapacitors, *Small*, 2012, **8**, 452-459.
